# Supplementary material
Source: PubMed Central journal article supplement (PMC2760450)

# DNA Nanotubes (DNA-NTs) as Combinatorial Vehicles for Cellular Delivery

*Seung-Hyeon Ko, Haipeng Liu, Yi Chen, Chengde Mao\**

Purdue University, Department of Chemistry, West Lafayette, Indiana 47907, USA

## Supporting Information

**Figure S1.** Test whether the cell membranes are intact by YOYO-1 staining and whether Cy3-DNA conjugates have entered the cells by DNase I treatment.

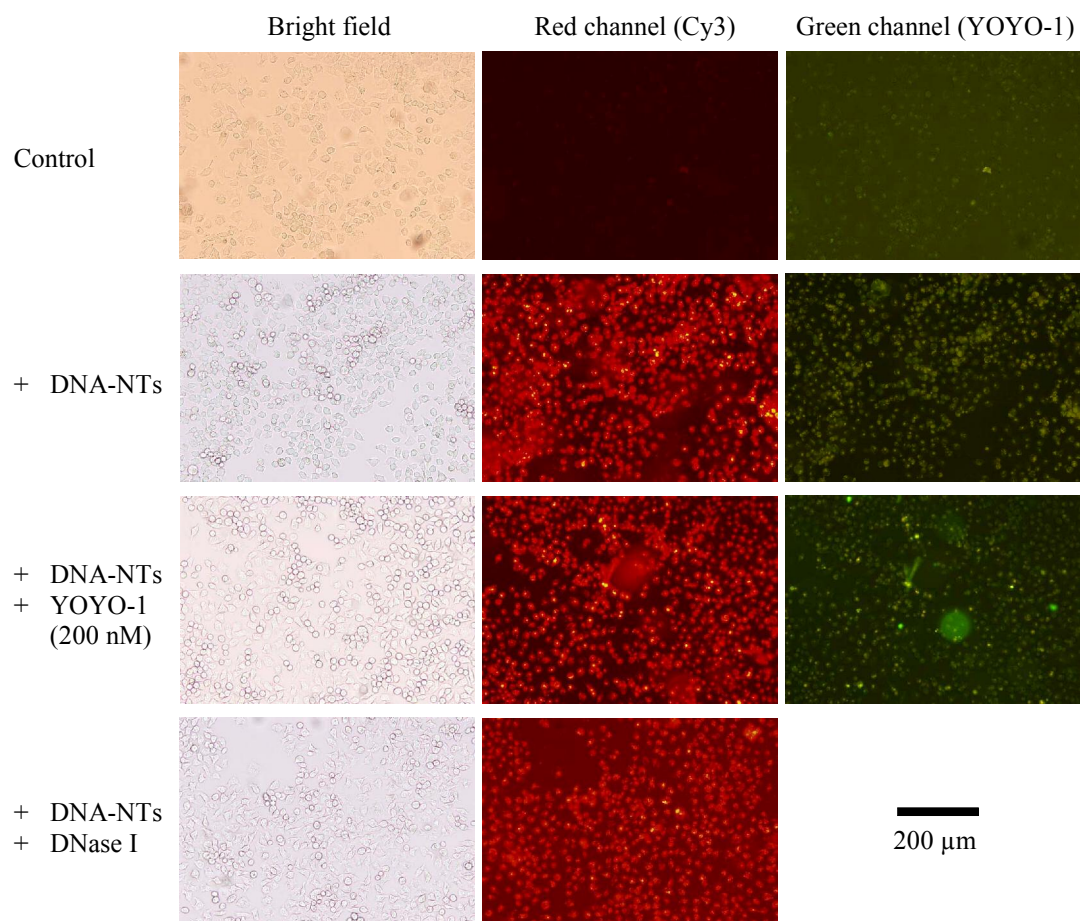

**Figure S2.** A control experiment shows that non-specific absorption of Cy3-DNA conjugates to cells can be easily washed off.

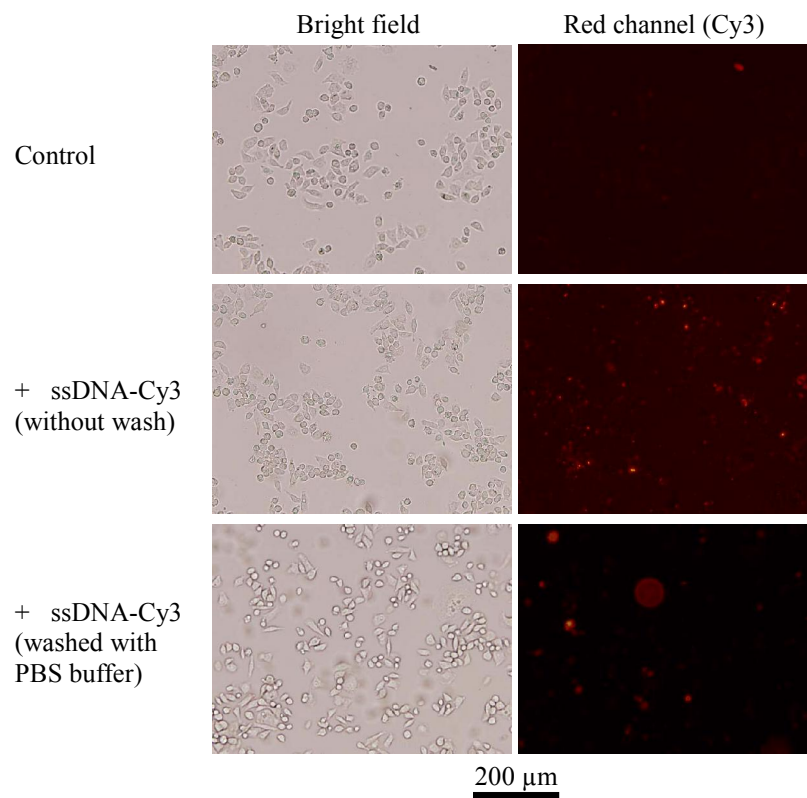

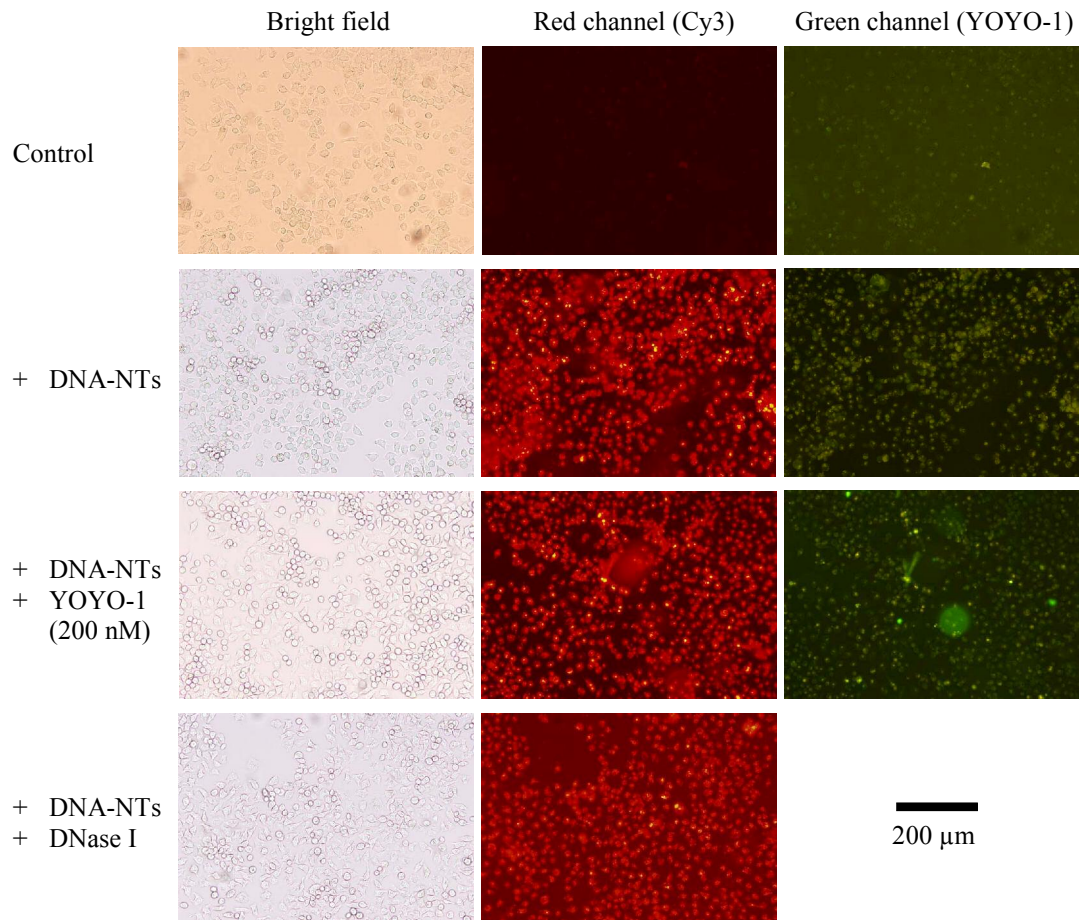

Supplement: NIHMS86531-supplement-1_si_001.pdf [file NIHMS86531-supplement-1_si_001.pdf]
